# Supplementary material for: Measuring Mitochondrial Oxygen Tension during Red Blood Cell Transfusion in Chronic Anemia Patients: A Pilot Study
Source: Biomedicines. 2023 Jun 30;11(7):1873. doi: 10.3390/biomedicines11071873 (PMC10376882; doi:10.3390/biomedicines11071873)
Supplement: Supplementary file 1 [file biomedicines-11-01873-s001.zip › biomedicines-1934899-supplementary.pdf]

# Supplementary Materials

**Table S1.** Time in days between measurements for the patients that have been measured twice.

| Subject Number | Time (days) |
|----------------|-------------|
| 1              | 14          |
| 2              | 21          |
| 3              | 14          |
| 4              | 35          |
| 5              | 59          |
| 6              | 35          |
| 7              | 10          |
| 8              | 8           |
| 9              | 6           |
| 10             | 7           |
| 11             | 14          |

## Subcohort Analysis

Stratified analysis of the mitoPO<sub>2</sub> data. Increase or decrease stratification was determined by the ratio. If the ratio was  $\geq 1.0$  it was an increasing observation, lower than 0.99 was considered a decreased observation. The following four sub comparisons were done.

- Group 1 RBCT values compared to the Baseline figure 1 A supplementary
- Group 1 FC values compared to RBCT figure 1 B supplementary
- Group 2 FC values compared to Baseline figure 1 C supplementary
- Group 2 RBCT values compared to FC figure 1 D supplementary

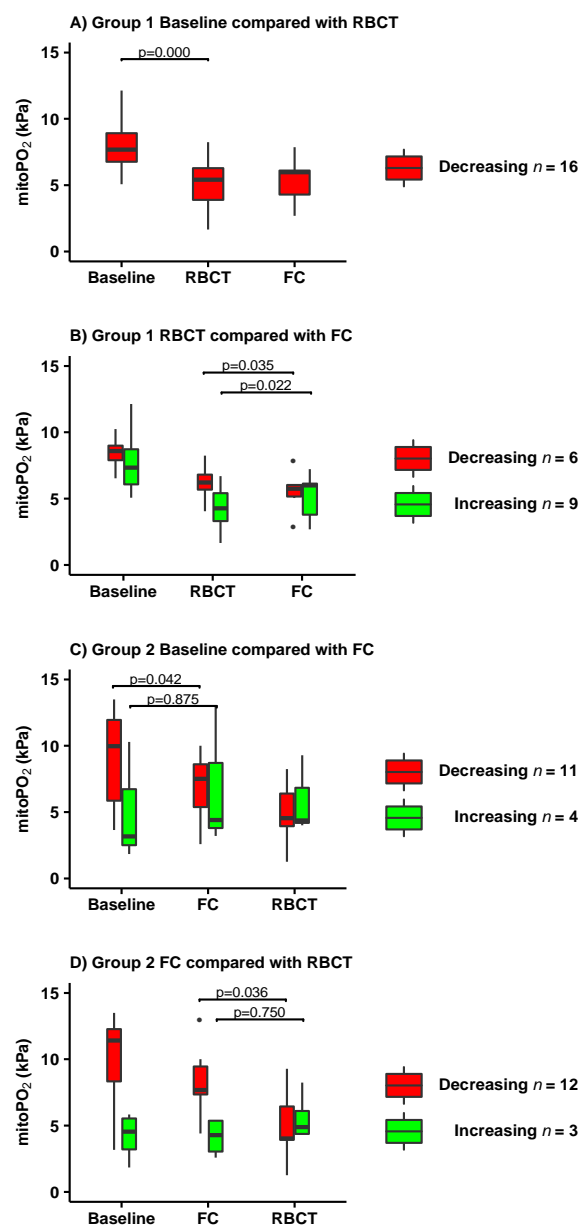

**Figure S1.** Sub comparisons with stratification increasing and decreasing observations between timepoints. (A) comparison Baseline and RBCT, (B) comparison RBCT and FC, (C) comparison Baseline and FC, (D) comparison between FC and RBCT.
